# Supplementary material for: In situ synthesis of edge-enriched MoS2 hierarchical nanorods with 1T/2H hybrid phases for highly efficient electrocatalytic hydrogen evolution
Source: Royal Society of Chemistry journal article supplement (doi:10.1039/c9ce00159j), 2019-01-01
Supplement: c9ce00159j1.pdf [file c9ce00159j1.pdf]

## Supporting Information for

### **In-Situ Synthesis of Edge-Enriched MoS<sub>2</sub> Hierarchical Nanorods with 1T/2H Hybrid Phases for Highly Efficient Electrocatalytic Hydrogen Evolution**

Chengwei Wang<sup>a</sup>, HongFen Wang<sup>a</sup>, Zhiping Lin<sup>b</sup>, Wen Li<sup>\*a</sup>, Bo Lin<sup>a</sup>, Wenzheng Qiu<sup>a</sup>, Yu Quan<sup>a</sup>, Zhaohui Liu<sup>a</sup>, Shougang Chen<sup>\*a</sup>

---

*a School of Materials Science & Engineering, Ocean University of China, Qingdao, 266100, PR China*

*b School of Advanced Study, Taizhou University, 318000, PR China*

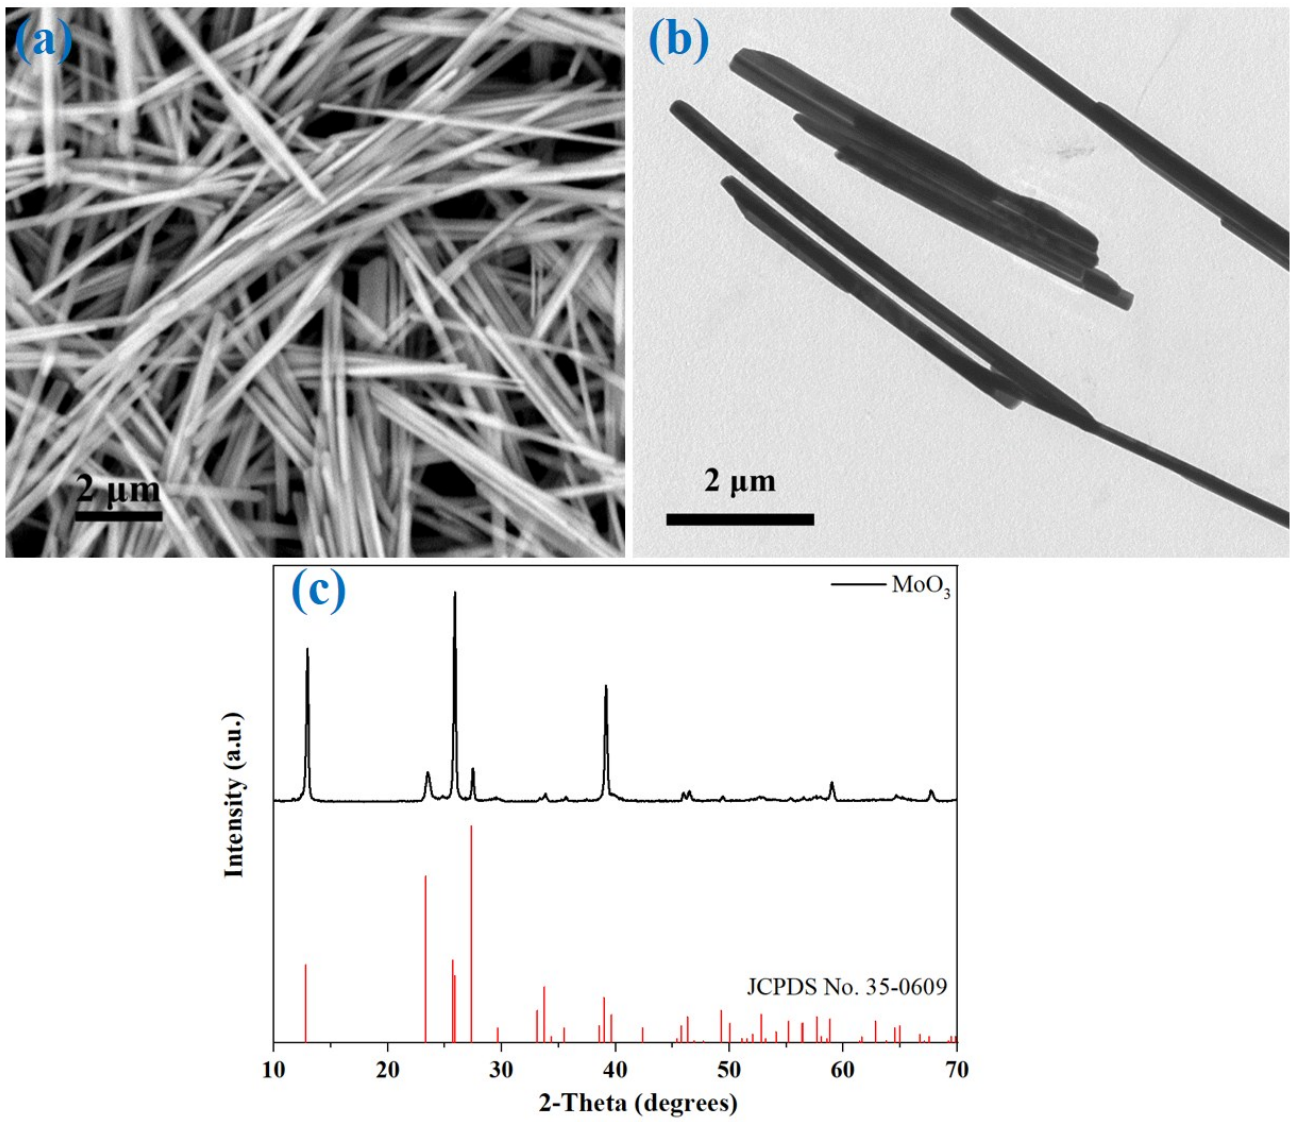

**Figure S1.** (a) SEM image and (b) TEM images of the as-prepared MoO<sub>3</sub> templates; (c) XRD spectra of the as-prepared MoO<sub>3</sub> templates

Table 1 Summary of hydrogen evolution reaction performance of Mo-based electrocatalysts.

| Catalysts                                                          | Electrode/supporting materials | electrolyte                          | $\eta_{10}$<br>(mV) | Tafel (mV/dec) | Ref.      |
|--------------------------------------------------------------------|--------------------------------|--------------------------------------|---------------------|----------------|-----------|
| Mo <sub>2</sub> C                                                  | Glass carbon                   | 0.5 M H <sub>2</sub> SO <sub>4</sub> | 150                 | 55             | 1         |
| (1T/2H) MoS <sub>2</sub> /a-MoO <sub>3</sub><br>nanoflowers        | Glass carbon                   | 0.5 M H <sub>2</sub> SO <sub>4</sub> | 232                 | 81             | 2         |
| 1T MoSSe<br>nanodots                                               | Glass carbon                   | 0.5 M H <sub>2</sub> SO <sub>4</sub> | 140                 | 40             | 3         |
| 1T/2H-MoS <sub>2</sub> nanosheets                                  | Glass carbon                   | 0.5 M H <sub>2</sub> SO <sub>4</sub> | 220                 | 61             | 4         |
| 1T/2H MoS <sub>2</sub>                                             | Glass carbon                   | 0.5 M H <sub>2</sub> SO <sub>4</sub> | 234                 | 46             | 5         |
| Defect-rich MoS <sub>2</sub> nanowall                              | Glass carbon                   | 0.5 M H <sub>2</sub> SO <sub>4</sub> | 95                  | 78             | 6         |
| MoO <sub>2</sub> /MoSe <sub>2</sub> Core-Shell<br>Nanosheet Arrays | Glass carbon                   | 0.5 M H <sub>2</sub> SO <sub>4</sub> | 181                 | 49.1           | 7         |
| Metallic-phase MoS <sub>2</sub>                                    | Glass carbon                   | 0.5 M H <sub>2</sub> SO <sub>4</sub> | 175                 | 41             | 8         |
| Strained vacancy MoS <sub>2</sub>                                  | Glass carbon                   | 0.5 M H <sub>2</sub> SO <sub>4</sub> | 170                 | 60             | 9         |
| Flower-like<br>MoS <sub>2</sub> nanosheet film                     | Glass carbon                   | 0.5 M H <sub>2</sub> SO <sub>4</sub> | 200                 | 49             | 10        |
| Porous 1T MoS <sub>2</sub>                                         | Glass carbon                   | 0.5 M H <sub>2</sub> SO <sub>4</sub> | 153                 | 43             | 11        |
| Ni-Co-MoS <sub>2</sub> Nanoboxes                                   | Glass carbon                   | 0.5 M H <sub>2</sub> SO <sub>4</sub> | 155                 | 51             | 12        |
| MoS <sub>2</sub> /carbon hybrids                                   | Glass carbon                   | 0.5 M H <sub>2</sub> SO <sub>4</sub> | 216                 | 64             | 13        |
| 1T/2H-MoS <sub>2</sub> hierarchical<br>nanorods                    | Glass carbon                   | 0.5 M H <sub>2</sub> SO <sub>4</sub> | 156                 | 47.9           | This work |

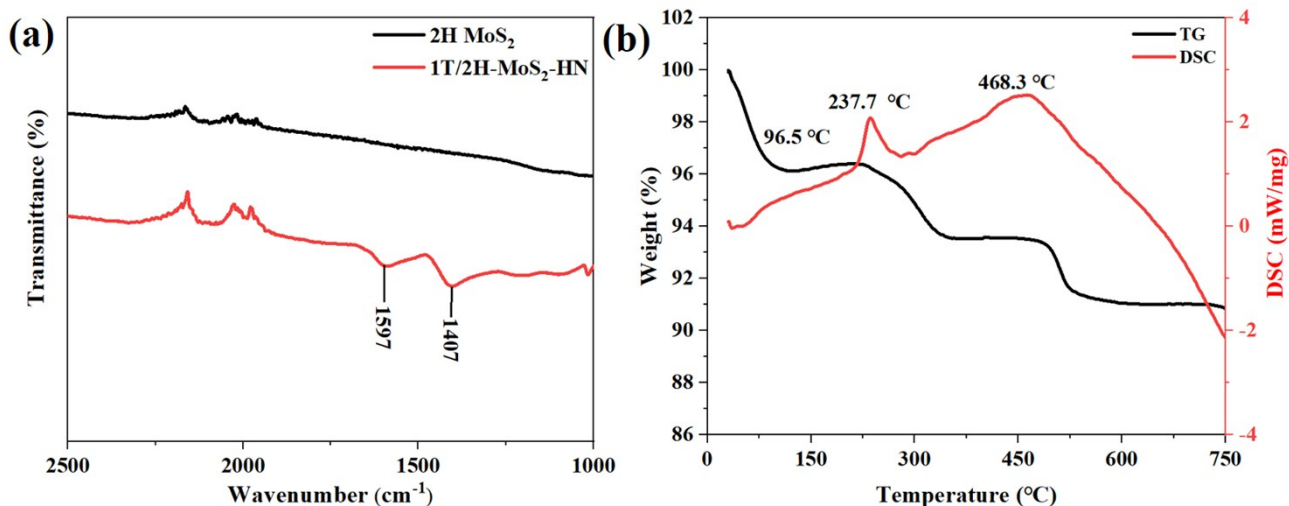

Figure S2. (a) FTIR spectrum, (b) DSC/TGA analysis of the 1T/2H-MoS<sub>2</sub>-HN sample

The absorption peak at 1597 cm<sup>-1</sup> was attributed to the bending vibration of surface water, and the absorption peak at 1403 cm<sup>-1</sup> is attributed to the NH<sub>4</sub><sup>+</sup> group (Figure S2a). The DSC curve of 1T/2H-MoS<sub>2</sub>-HN (Figure S2 b) shows obvious endothermic peaks at 96.5 °C, 237.7 °C and 468.3 °C, respectively, corresponding to the mass loss steps. The first mass loss step at 96.5 °C can be attributed to the release of the inserted water, H<sub>3</sub>O<sup>+</sup> and possible NH<sub>3</sub> (4%).<sup>5</sup> The second mass loss step can be attributed to the deintercalation of inserted NH<sub>4</sub><sup>+</sup> (3%).<sup>14,15</sup> Besides, the peaks at a remarkable exothermic peak emerges at 237.7 °C, revealing a structural conversion from the metastable 1T MoS<sub>2</sub> to the stable 2H MoS<sub>2</sub>, which is much higher than the transformation temperature (95 °C) of the monolayer 1T phase. Therefore, it can be concluded that the guest species of NH<sub>4</sub><sup>+</sup> in 1T/2H-MoS<sub>2</sub>-HN could stable the 1T phase. The third mass loss step can be attributed to the transformation from amorphous MoS<sub>3</sub> to MoS<sub>2</sub> (2%). And there is also an exothermic peak at 468.3 °C caused by the structure conversion and the transformation from amorphous MoS<sub>3</sub> to MoS<sub>2</sub>.<sup>16-20</sup>

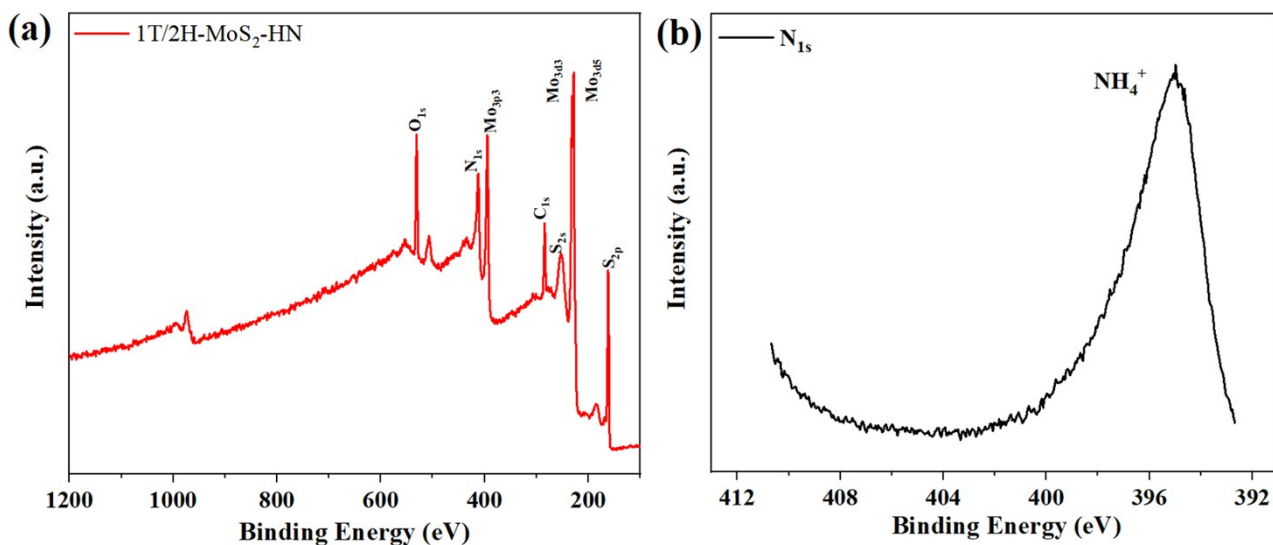

Figure S3. (a) X-ray photoelectron spectroscopy survey data, (b) X-ray photoelectron spectroscopy of N<sub>1s</sub>.

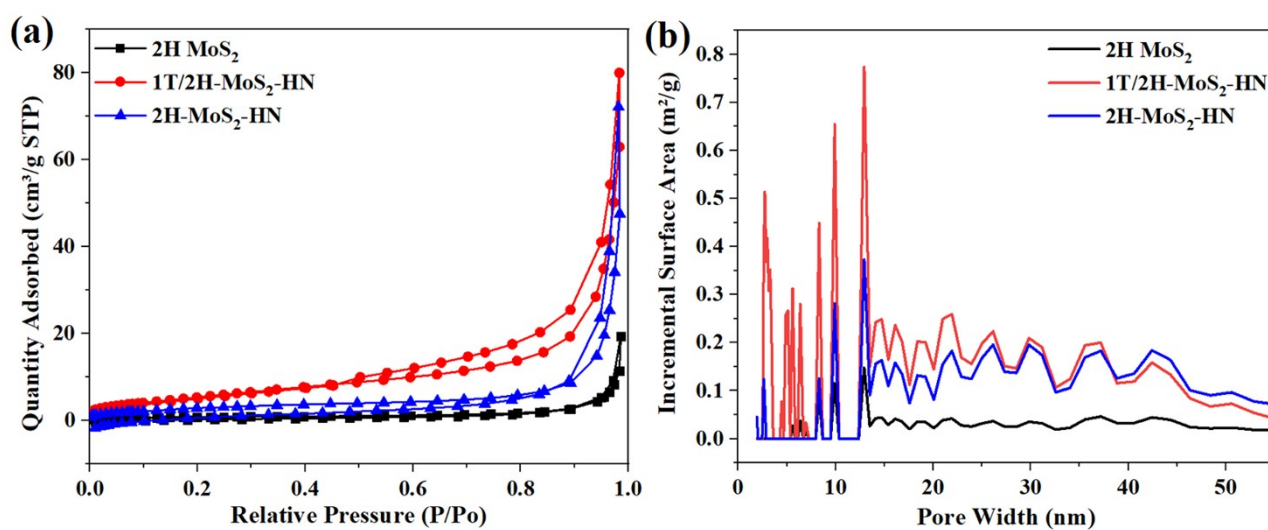

Figure S4. (a) The  $N_2$  adsorption/desorption isotherms and (b) corresponding pore size distribution.

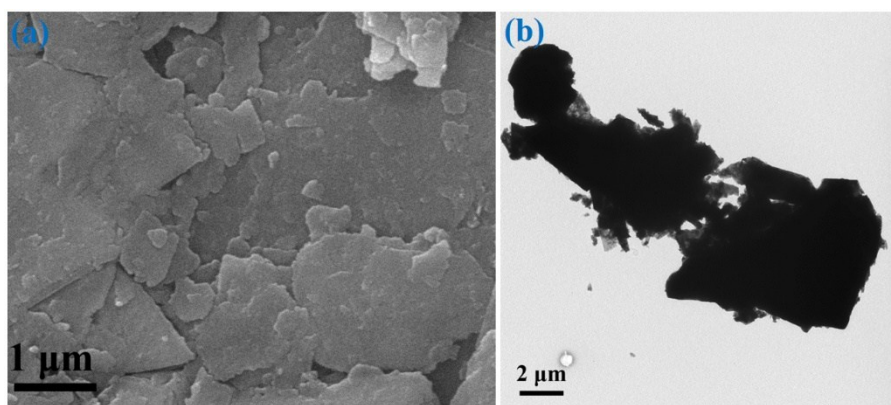

Figure S5. SEM and TEM images of the purchased  $MoS_2$

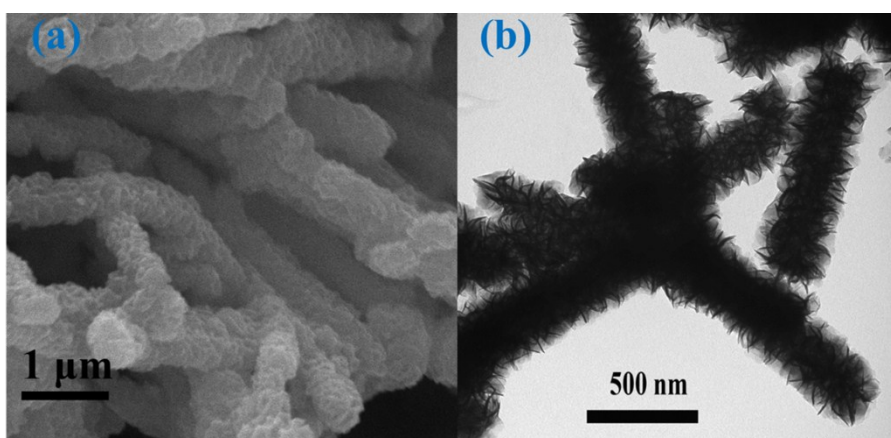

Figure S6. (a) SEM image, (b) TEM image of the 2H- $MoS_2$ -HN

## References

1. J. Dong, Q. Wu, C. Huang, W. Yao and Q. Xu, *Journal of Materials Chemistry A*, 2018, 6, 10028–10035.
2. A. Manikandan, P. R. Ilango, C.-W. Chen, Y.-C. Wang, Y.-C. Shih, L. Lee, Z. M. Wang, H. Ko and Y.-L. Chueh, *Journal of Materials Chemistry A*, 2018, 6, 15320–15329.
3. C. Tan, Z. Luo, A. Chaturvedi, Y. Cai, Y. Du, Y. Gong, Y. Huang, Z. Lai, X. Zhang, L. Zheng, X. Qi, M. H. Goh, J. Wang, S. Han, X. J. Wu, L. Gu, C. Kloc and H. Zhang, *Adv Mater*, 2018, 30.
4. Z. Liu, Z. Gao, Y. Liu, M. Xia, R. Wang and N. Li, *ACS Appl Mater Interfaces*, 2017, 9, 25291–25297.
5. D. Wang, X. Zhang, S. Bao, Z. Zhang, H. Fei and Z. Wu, *Journal of Materials Chemistry A*, 2017, 5, 2681–2688.
6. J. Xie, H. Qu, J. Xin, X. Zhang, G. Cui, X. Zhang, J. Bao, B. Tang and Y. Xie, *Nano Research*, 2017, 10, 1178–1188.
7. X. Chen, G. Liu, W. Zheng, W. Feng, W. Cao, W. Hu and P. Hu, *Advanced Functional Materials*, 2016, 26, 8537–8544.
8. H. Deng, C. Zhang, Y. Xie, T. Tumlin, L. Giri, S. P. Karna and J. Lin, *Journal of Materials Chemistry A*, 2016, 4, 6824–6830.
9. X. Geng, W. Sun, W. Wu, B. Chen, A. Al-Hilo, M. Benamara, H. Zhu, F. Watanabe, J. Cui and T. P. Chen, *Nat Commun*, 2016, 7, 10672.
10. H. Li, C. Tsai, A. L. Koh, L. Cai, A. W. Contryman, A. H. Fragapane, J. Zhao, H. S. Han, H. C. Manoharan, F. Abild-Pedersen, J. K. Norskov and X. Zheng, *Nat Mater*, 2016, 15, 364.
11. F. Z. Wang, M. J. Zheng, B. Zhang, C. Q. Zhu, Q. Li, L. Ma and W. Z. Shen, *Sci Rep*, 2016, 6, 31092.
12. Y. Yin, J. Han, Y. Zhang, X. Zhang, P. Xu, Q. Yuan, L. Samad, X. Wang, Y. Wang, Z. Zhang, P. Zhang, X. Cao, B. Song and S. Jin, *J Am Chem Soc*, 2016, 138, 7965–7972.
13. X. Y. Yu, Y. Feng, Y. Jeon, B. Guan, X. W. Lou and U. Paik, *Adv Mater*, 2016, 28, 9006–9011.
14. A. Anto Jeffery, C. Nethravathi and M. Rajamathi, *The Journal of Physical Chemistry C*, 2014, 118, 1386–1396.
15. Z. Wu, C. Tang, P. Zhou, Z. Liu, Y. Xu, D. Wang and B. Fang, *Journal of Materials Chemistry A*, 2015, 3, 13050–13056.
16. J. Zhang, S. P. Hu, Y. L. Feng, B. Xu and Y. H. Guo, *Advanced Materials Research*, 2011, 287–290, 2049–2052.
17. P. K. Panigrahi and A. Pathak, *Journal of Nanoparticles*, 2013, 2013, 1–10.
18. Q. Van Le, T. P. Nguyen, M. Park, W. Sohn, H. W. Jang and S. Y. Kim, *Advanced Optical Materials*, 2016, 4, 1796–1804.
19. Z. Ye, J. Yang, B. Li, L. Shi, H. Ji, L. Song and H. Xu, *Small*, 2017, 13.
20. M. A. R. Anjum, H. Y. Jeong, M. H. Lee, H. S. Shin and J. S. Lee, *Adv Mater*, 2018, 30, e1707105.
